# Supplementary material for: An open-source refactoring of the Canadian Small Lakes Model for estimates of evaporation from medium-sized reservoirs
Source: Copernicus journal article supplement (doi:10.5194/gmd-17-4911-2024), 2024-06-21
Supplement: Supplementary file 1 [file gmd-17-4911-2024-supplement.pdf]

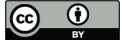

*Supplement of*

## **An open-source refactoring of the Canadian Small Lakes Model for estimates of evaporation from medium-sized reservoirs**

**M. Graham Clark and Sean K. Carey**

*Correspondence to:* M. Graham Clark ([dr.mg.clark@gmail.com](mailto:dr.mg.clark@gmail.com))

The copyright of individual parts of the supplement might differ from the article licence.

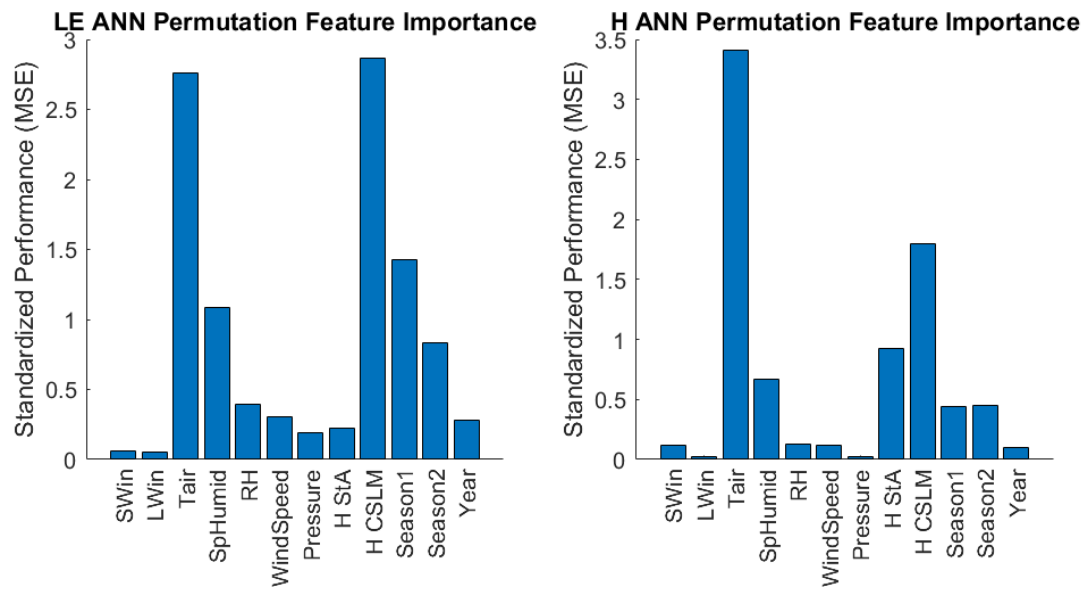

Figure S1: Standardized feature performance (mean squared error) from permutation analysis on Artificial Neural Networks used for gap filling latent heat (left) and sensible heat (right). Higher value implies greater error associated with randomizing the sequence of the input feature.

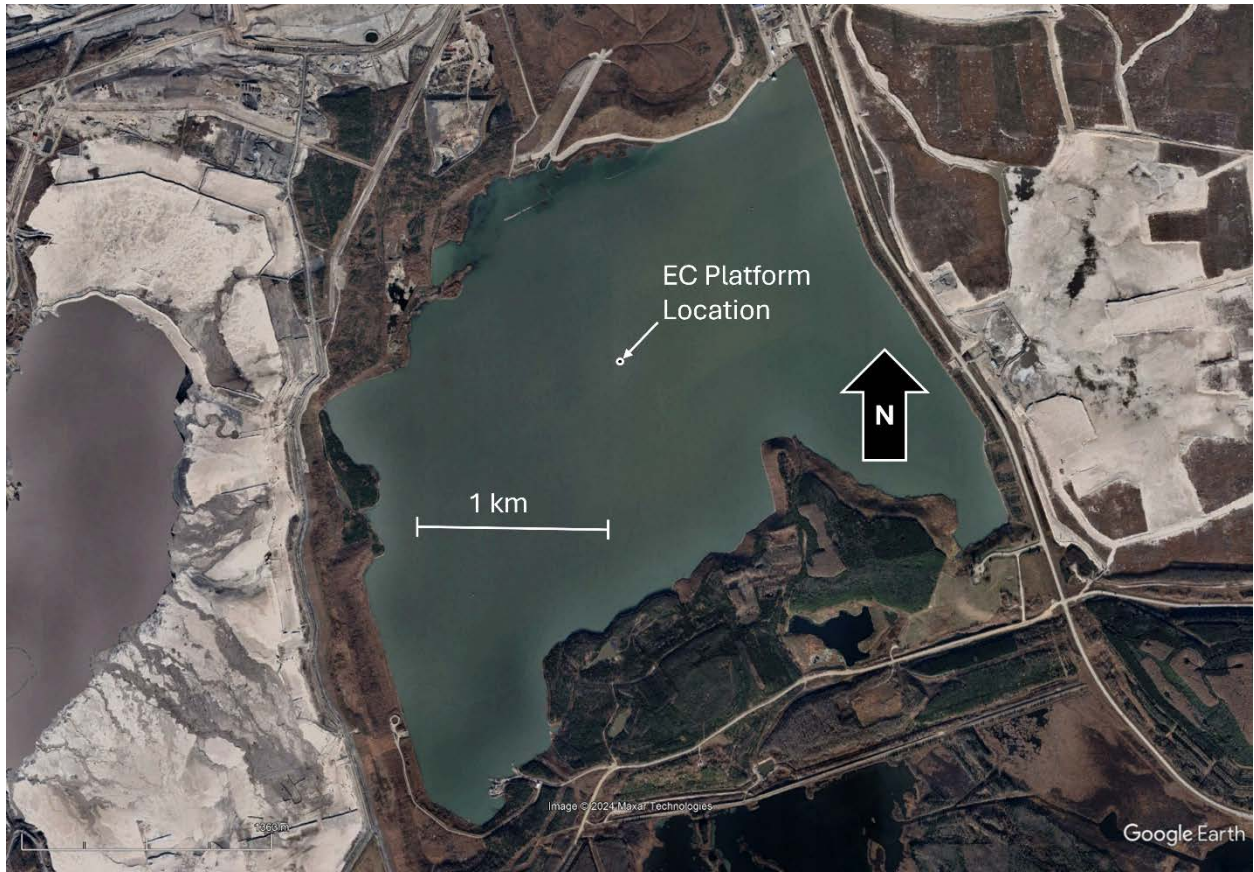

Figure S2: Base Mine Lake, platform location, and surrounding area. Google Earth. © Google Earth

Table S1: List of updated variable names

| OldName  | NewName                      | Definition                                                                                                     |
|----------|------------------------------|----------------------------------------------------------------------------------------------------------------|
| ALBSLGAT | SnowPackAlbedo               | Snow albedo [ ]                                                                                                |
| ALBSLROT | SnowPackAlbedo_In            | Snow albedo [ ] (ROT)                                                                                          |
| ALILROT  | DiagTotalNIRAtLakeSurface_In | Diagnosed total near-infrared albedo of lake surface [ ] (ROT)                                                 |
| ALVLGAT  | DiagTotalVisAtLakeSurface    | Diagnosed total visible albedo of lake surface [ ]                                                             |
| ALVLROT  | DiagTotalVisAtLakeSurface_In | Diagnosed total visible albedo of lake surface [ ] (ROT)                                                       |
| ASIDROT  | SnowAlbedoNIR_In             | Optional user-specified value of snow near-infrared albedo to override CLASS-calculated value [ ] (ROT)        |
| ASILGAT  | SnowAlbedoNIR                | Optional user-specified value of snow near-infrared albedo to override CLASS-calculated value [ ] (ROT)        |
| ASVDROT  | SnowAlbedoVis_In             | Optional user-specified value of snow visible albedo to override CLASS-calculated value (ROT)                  |
| ASVLGAT  | SnowAlbedoVis                | Optional user-specified value of snow visible albedo to override CLASS-calculated value (ROT)                  |
| BCSNROT  | --                           | Removed, had no purpose                                                                                        |
| BLAKGAT  | ExtinctionCoeff              | Beers Law Parameter - extinction coefficient (ROT)                                                             |
| BLAKROT  | ExtinctionCoeff_In           | Beers Law Parameter - extinction coefficient (ROT)                                                             |
| CDHGAT   | SurfDragCoeffForHeat         | Surface drag coefficient for heat [ ] (CDH)                                                                    |
| CDHROT   | SurfDragCoeffForHeat_In      | Surface drag coefficient for heat [ ] (CDH)                                                                    |
| CDMGAT   | SurfDragCoeffForMomentum     | Surface drag coefficient for momentum [ ] (CDM)                                                                |
| CDMROT   | SurfDragCoeffForMomentum_In  | Surface drag coefficient for momentum [ ] (CDM)                                                                |
| CGRAV    | --                           | Acceleration due to gravity [m s <sup>-1</sup> ], removed and just used GRAV instead since they are equivalent |
| CKARM    | --                           | Von Karman constant [-], removed and just used VKC                                                             |
| CLHMLT   | LatentHeatOfFreezingH2O      | Latent heat of freezing of water [J kg <sup>-1</sup> ], defined as 0.334 x 10 <sup>6</sup>                     |
| CLHVAP   | LatentHeatOfVaporizationH2O  | Latent heat of vaporization of water [J kg <sup>-1</sup> ], defined as 2.501 x 10 <sup>6</sup>                 |
| COSZ     | CosineOfSolarZenith_Temp     |                                                                                                                |
| CPD      | --                           | Specific heat of air [J kg <sup>-1</sup> K <sup>-1</sup> ]                                                     |
| CSZGAT   | CosineOfSolarZenith          | Cosine of solar zenith angle [ ]                                                                               |
| CSZROW   | CosineOfSolarZenith_In       | Cosine of solar zenith angle [ ]                                                                               |
| CTLSTP   | ChangeInInternalLakeEnergy   | Change in internal energy of lake over current time step [W m <sup>-2</sup> ]                                  |
| DAY      | CurrentDecimalDay            | Decimal Day                                                                                                    |
| DECL     | Declanation                  | Declanation                                                                                                    |

|         |                             |                                                                 |
|---------|-----------------------------|-----------------------------------------------------------------|
| DEGLAT  | LatitudeInDeg_In            | Load from the lake.ini (4th line, 7th value)                    |
| DEGLON  | LongitudeInDeg_In           | Load from the lake.ini (4th line, 8th value)                    |
| DELMAX  | MaxThermoclineThickness     | Maximum thermocline thickness [m]                               |
| DELMIN  | MinThermoclineThickness     | Minimum thermocline thickness [m]                               |
| DELSKIN | ThicknessOfSurfaceSkin      | Thickness of lake surface skin [m]                              |
| DELT    | DeltaTimeStep               | Time step [s]                                                   |
| DELU    | MeanMixLyrMomentum          | Shear Flow / Mean layer momentum                                |
| DELZLK  | LakeLayerThickness          | Thickness of lake layers [m]                                    |
| DHMAX   | MaxDeltaThermoclineDepth    | Maximum change in thermocline depth in one timestep [m]         |
| DRLGAT  | LakeSurfaceDragAtNeutral    | Lake Surface drag coefficient under neutral stability [ ]       |
| DRLROT  | LakeSurfaceDragAtNeutral_In | Lake Surface drag coefficient under neutral stability [ ] (ROT) |
| DTEMP   | ThermoclineTempDelta        | Temperature delta over the thermocline                          |
| DUMAX   | MaxDeltaMixingLayer         | Maximum change in mixing layer momentum in one timestep         |
| EFLGAT  | EvapEfficiencyAtLakeSurf    | Evaporation efficiency at lake surface [ ]                      |
| EFLROT  | EvapEfficiencyAtLakeSurf_In | Evaporation efficiency at lake surface [ ] (ROT)                |
| EMSW    | ThermalEmissivityOfH2O      | Thermal emissivity of water                                     |
| EXPW    | ExpansivityOfWater          | Expansivity                                                     |

This is passed in .ini file. Both MID and FARE are the 6th line of ini, FARE is set to 1 (MID = 0). Looks like some sort of sub-grid machinery. If Fare is >0 land indexing is used, otherwise water indexing is used (lines 914)

|          |                                         |                                                                                                                                                                        |
|----------|-----------------------------------------|------------------------------------------------------------------------------------------------------------------------------------------------------------------------|
| FAREROT  | FractionalCoverageOfMosaicTileOnArea_In |                                                                                                                                                                        |
| FDLGAT   | LongwaveDownwelling                     | Downwelling longwave radiation at bottom of atmosphere [W m-2]                                                                                                         |
| FDLROW   | LongwaveDownwelling_In                  | Downwelling longwave radiation at bottom of atmosphere [W m-2]                                                                                                         |
| FLGLGAT  | DiagNetLongwaveAtLakeSurface            | Diagnosed net longwave radiation at lake surface [W m2]                                                                                                                |
| FLGLROT  | DiagNetLongwaveAtLakeSurface_In         | Diagnosed net longwave radiation at lake surface [W m2]                                                                                                                |
| FLGSLGAT | DiagNetLongwaveAtSnowSurface            | Diagnosed net longwave radiation at snow surface [W m-2]                                                                                                               |
| FLGSLROT | DiagNetLongwaveAtSnowSurface_In         | Diagnosed net longwave radiation at snow surface [W m-2] (ROT)                                                                                                         |
| FSDBLGAT | --                                      | Not used                                                                                                                                                               |
| FSDBROL  | --                                      | Not used                                                                                                                                                               |
|          |                                         | only the total incoming shortwave radiation FSDOWN is available; it is partitioned 50:50 between the incoming visible (FSVHROW) and near-infrared (FSIHROW) radiation. |
| FSDOWN   | ShortwaveDownwelling_In                 |                                                                                                                                                                        |
| FSFBLGAT | --                                      | Not used                                                                                                                                                               |
| FSFBROL  | --                                      | Not used                                                                                                                                                               |

|          |                                   |                                                                                                                                                                                                                                            |
|----------|-----------------------------------|--------------------------------------------------------------------------------------------------------------------------------------------------------------------------------------------------------------------------------------------|
| FSGLGAT  | DiagNetShortwaveAtLakeSurface     | Diagnosed net shortwave radiation at lake surface [W m2]                                                                                                                                                                                   |
| FSGLROT  | DiagNetShortwaveAtLakeSurface_In  | Diagnosed net shortwave radiation at lake surface [W m2] (ROT)                                                                                                                                                                             |
| FSGSLGAT | DiagNetShortwaveAtSnowSurface     | Diagnosed net shortwave radiation at snow surface [W m-2]                                                                                                                                                                                  |
| FSGSLROT | DiagNetShortwaveAtSnowSurface_In  | Diagnosed net shortwave radiation at snow surface [W m-2] (ROT)                                                                                                                                                                            |
| FSIHGAT  | NIRIncidentOnSurf                 | Near-infrared radiation incident on horizontal surface [W m-2]                                                                                                                                                                             |
| FSIHROW  | NIRIncidentOnSurf_In              | Near-infrared radiation incident on horizontal surface [W m-2] (ROT)                                                                                                                                                                       |
| FSSBLGAT | ShortwaveDownwellingIRandVIS      | Something about shortwave, used in TSOLVE with albedo<br>This is assigned from FSSBROL(1,1)=FSIH and FSSBROL(1,2)=FSVH which are NIR and Vis incident on a horizontal surface, which are each simply 0.5 of FSDOWN (shortwave downwelling) |
| FSSBROL  | ShortwaveDownwellingIRAandVIS_In  | 0.5 of FSDOWN (shortwave downwelling) (ROT)                                                                                                                                                                                                |
| FSVHGAT  | VisibleIncidentOnSurf             | Visible radiation incident on horizontal surface [W m-2]                                                                                                                                                                                   |
| FSVHROW  | VisibleIncidentOnSurf_In          | Visible radiation incident on horizontal surface [W m-2] (ROT)                                                                                                                                                                             |
| GCROW    | SubareaFractionalCoverage_In      | Subarea fractional coverage of modelled area [ ] (ROT)                                                                                                                                                                                     |
| GRAV     | GravConstant                      | Gravitational Constant fixed to 10^-5 precision [m s-1]                                                                                                                                                                                    |
| GRED     | ReducedGravity                    | Reduced Gravity due to density of the mixed layer                                                                                                                                                                                          |
| GTLGAT   | DiagSurfBlkBodyTemp               | Diagnosed effective surface black-body temperature [K]                                                                                                                                                                                     |
| GTLROT   | DiagSurfBlkBodyTemp_In            | Diagnosed effective surface black-body temperature [K] (ROT)                                                                                                                                                                               |
| HCAP     | HeatCapacityOfLakeSurface         |                                                                                                                                                                                                                                            |
| HCPICE   | HeatCapacityOfIce                 | Volumetric heat capacity of ice [J m-3 K-1], defined as 1.9257 x 10^6                                                                                                                                                                      |
| HCPW     | HeatCapacityOfH2O                 | Volumetric heat capacity of water [J m-3 K-1], defined as 4.187 x 10^6                                                                                                                                                                     |
| HDPTH    | DepthToThermocline                | Mixed Layer depth                                                                                                                                                                                                                          |
| HDPTHMIN | MinimumMixingDepth                | Minimum mixing depth [m], set at 0.5                                                                                                                                                                                                       |
| HEVLGAT  | DiagLatentHeatOnLake              | Diagnosed total surface latent heat flux on Lake [W m2]                                                                                                                                                                                    |
| HEVLROT  | DiagLatentHeatOnLake_In           | Diagnosed total surface latent heat flux on Lake [W m2] (ROT)                                                                                                                                                                              |
| HEVSLGAT | DiagLatentHeatOnSnow              | Diagnosed latent heat flux at snow surface [W m-2]                                                                                                                                                                                         |
| HEVSLROT | DiagLatentHeatOnSnow_In           | Diagnosed latent heat flux at snow surface [W m-2] (ROT)                                                                                                                                                                                   |
| HFSLGAT  | DiagSensHeatOnLake                | Diagnosed total surface sensible heat flux on Lake [W m2]                                                                                                                                                                                  |
| HFSLROT  | DiagSensHeatOnLake_In             | Diagnosed total surface sensible heat flux on Lake [W m2] (ROT)                                                                                                                                                                            |
| HFSSLGAT | DiagSensHeatOnSnow                | Diagnosed sensible heat flux at snow surface [W m-2]                                                                                                                                                                                       |
| HFSSLROT | DiagSensHeatOnSnow_In             | Diagnosed sensible heat flux at snow surface [W m-2] (ROT)                                                                                                                                                                                 |
| HLAKGAT  | LakeDepth                         | Depth of the lake                                                                                                                                                                                                                          |
| HLAKROT  | LakeDepth_In                      | Depth of the lake (ROT)                                                                                                                                                                                                                    |
| HMFLGAT  | DiagPhaseChangeWaterAtLakeSurface | Diagnosed energy associated with phase change of water on lake [W m-2]                                                                                                                                                                     |

|          |                                       |                                                                                                           |
|----------|---------------------------------------|-----------------------------------------------------------------------------------------------------------|
| HMFLROT  | DiagPhaseChangeWaterAtLakeSurface_In  | Diagnosed energy associated with phase change of water on lake [W m-2]                                    |
| HMFNLGAT | DiagPhaseChangeWaterInSnow            | Diagnosed energy associated with phase change of water in snow [W m-2]                                    |
| HMFNLROT | DiagPhaseChangeWaterInSnow_In         | Diagnosed energy associated with phase change of water in snow [W m-2] (ROT)                              |
| HOUR     | SolarHour                             |                                                                                                           |
| HTCLGAT  | DiagDelEnergyDueConducOrMassInLake    | Diagnosed internal energy change of lake due to conduction and/or change in mass [W m-2]                  |
| HTCLROT  | DiagDelEnergyDueConducOrMassInLake_In | Diagnosed internal energy change of lake due to conduction and/or change in mass [W m-2] (ROT)            |
| HTCSLGAT | DiagDelEnergyDueConducOrMassInSnow    | Diagnosed internal energy change of snow pack due to conduction and/or change in mass [W m-2]             |
| HTCSLROT | DiagDelEnergyDueConducOrMassInSnow_In | Diagnosed internal energy change of snow pack due to conduction and/or change in mass [W m-2] (ROT)       |
| IALS     |                                       | Switches for the codebase, mostly CLASS related                                                           |
| ICEBOT   | IceBottomDepth                        | Bottom of ice layer                                                                                       |
| ICETOP   | IceTopDepth                           | Top of ice layer                                                                                          |
| IDAY     | CurrentDay                            | Julian Day of the Year                                                                                    |
| IGL      |                                       |                                                                                                           |
| Ihour    | CurrentHour                           | Hour of the day                                                                                           |
| ILG      | NumOfTilesInAllGrids                  | Product of NLAT and NMOS                                                                                  |
| ILMOS    | IndGridLand                           | Index of grid cell corresponding to current element of gathered vector of land surface variables [ ]      |
| IMIN     | CurrentMin                            | Min Elapsed in the current hour                                                                           |
| IPCP     |                                       | Switches for the codebase, mostly CLASS related                                                           |
| ISLFD    |                                       | Switches for the codebase, mostly CLASS related                                                           |
| ISNOALB  |                                       | Switches for the codebase, mostly CLASS related                                                           |
| ITG      |                                       | Switches for the codebase, mostly CLASS related                                                           |
| IWMOS    | IndGridWater                          | Index of grid cell corresponding to current element of gathered vector of inland water body variables [ ] |
| IYEAR    | CurrentYear                           | Year of Run                                                                                               |
| IZREF    |                                       | Switches for the codebase, mostly CLASS related                                                           |

|          |                                     |                                                                                                             |
|----------|-------------------------------------|-------------------------------------------------------------------------------------------------------------|
| JLMOS    | IndMosaicLand                       | Index of mosaic tile corresponding to current element of gathered vector of land surface variables [ ]      |
| JWMOS    | IndMosaicWater                      | Index of mosaic tile corresponding to current element of gathered vector of inland water body variables [ ] |
| LKICEH   | LakeIceHeight                       | Height (depth) of the ice on the lake                                                                       |
| LLAKGAT  | LakeLength                          | Length of longest lake axis                                                                                 |
| LLAKROT  | LakeLength_In                       | Length of longest lake axis (ROT)                                                                           |
| MIDROT   | MosaicTileType                      | Mosaic tile type identifier (1 for land surface, 0 for inland lake)                                         |
| N        | IterationCounter                    |                                                                                                             |
| NBS      |                                     |                                                                                                             |
| NCOUNT   | DayCounter                          |                                                                                                             |
| NDAY     | NumberOfIterationsIn24Hours         |                                                                                                             |
| NLAGAT   | NumOfLakeLayers                     |                                                                                                             |
| NLAKMAX  | MaxNumOfLakes                       |                                                                                                             |
| NLAKROT  | NumOfLakeLayers_In                  |                                                                                                             |
| NLAT     | NumOfGridCells                      | Maximum number of grid cells to be modelled                                                                 |
| NLTEST   | NumOfGridCellsInRun                 | The number of grid cells for this test run                                                                  |
| NML      | TotalNumberOfMosaicTilesThatAreSurf | Total number of mosaic tiles in land surface gather vectors                                                 |
| NMOS     | NumOfMosaicTiles                    | Maximum number of mosaic tiles per grid cell being modelled                                                 |
| NMTEST   | NumOfMosaicTilesPerGridCellInRun    | The number of mosaic tiles per grid cell for this test run                                                  |
| NMW      | TotalNumberOfMosaicTilesThatAreH2O  | Total number of mosaic tiles in inland water gather vectors                                                 |
| PADRLGAT | PartialPressureOfDryAir             | Partial pressure of dry air [Pa]                                                                            |
| PADRRROW | PartialPressureOfDryAir_In          | Partial pressure of dry air [Pa]                                                                            |
| PCPLGAT  | PrecipOnLake                        | Diagnosed precipitation incident on lake [kg m-2 s-1]                                                       |
| PCPLROT  | PrecipOnLake_In                     | Diagnosed precipitation incident on lake [kg m-2 s-1] (ROT)                                                 |
| PCPNLGAT | PrecipOnSnow                        | Diagnosed precipitation incident on snow pack [kg m-2 s-1]                                                  |
| PCPNLROT | PrecipOnSnow_In                     | Diagnosed precipitation incident on snow pack [kg m-2 s-1] (ROT)                                            |
| PETLGAT  | DiagPotentialEvap                   | Diagnosed potential evapotranspiration [kg m-2 s-1]                                                         |
| PETLROT  | DiagPotentialEvap_In                | Diagnosed potential evapotranspiration [kg m-2 s-1] (ROT)                                                   |
| PI       | Pi                                  | Universal constant Pi fixed to 10 <sup>-13</sup> precision                                                  |
| PREROW   | SurfacePrecipRate_In                | Surface precipitation rate [kg m-2 s-1]                                                                     |
| PRESGAT  | SurfaceAirPressure                  | Surface air pressure [Pa]                                                                                   |
| PRESROW  | SurfaceAirPressure_In               | Surface air pressure [Pa]                                                                                   |
| QAGAT    | SpecificHumidityAtRef               | Specific humidity at reference height [kg kg-1]                                                             |



|           |                                  |                                                                                                                                                   |
|-----------|----------------------------------|---------------------------------------------------------------------------------------------------------------------------------------------------|
| QAROW     | SpecificHumidityAtRef_In         | Specific humidity at reference height [kg kg-1]                                                                                                   |
| QEVPLGAT  | LatentHeatFromLakeSubarea        | Latent heat flux from lake subarea [W m-2]                                                                                                        |
| QEVPLROT  | LatentHeatFromLakeSubarea_In     | Latent heat flux from lake subarea [W m-2] (ROT)                                                                                                  |
|           |                                  | Evaporation from the lake (added with sublimation (QFN) from snow to get EVAP flux), in CLASS functions it is redefined as QFG (Evap from ground) |
| QFLGAT    | LakeSurfaceEvap                  | Evaporation from the lake (ROT)                                                                                                                   |
| QFLROT    | LakeSurfaceEvap_In               | Evaporation from the lake (ROT)                                                                                                                   |
| QFNLGAT   | SnowSublimation                  | Sublimation from snow pack [kg m-2 s-1]                                                                                                           |
| QFNLRROT  | SnowSublimation_In               | Sublimation from snow pack [kg m-2 s-1] (ROT)                                                                                                     |
| QFSLGAT   | SensibleHeatFromSnowSubarea      |                                                                                                                                                   |
| QFSLROT   | SensibleHeatFromSnowSubarea_In   |                                                                                                                                                   |
|           |                                  | Product of surface drag coefficient, wind speed and surface-air specific humidity difference [m s-1]                                              |
| QFXLGAT   | ProdLakeDragWindSpdDelSpHumid    | Product of surface drag coefficient, wind speed and surface-air specific humidity difference [m s-1] (ROT)                                        |
| QFXLRROT  | ProdLakeDragWindSpdDelSpHumid_In | Product of surface drag coefficient, wind speed and surface-air specific humidity difference [m s-1] (ROT)                                        |
| QGLGAT    | DiagSurfSpecificHumidity         | Diagnosed surface specific humidity [kg kg-1]                                                                                                     |
| QGLROT    | DiagSurfSpecificHumidity_In      | Diagnosed surface specific humidity [kg kg-1] (ROT)                                                                                               |
| QLWOLGAT  | LongwaveUpwelling                | Upwelling longwave radiation from lake surface [W m-2] (L↑g)                                                                                      |
| QLWOLROT  | LongwaveUpwelling_In             | Upwelling longwave radiation from lake surface [W m-2] (L↑g) (ROT)                                                                                |
| QSENLGAT  | SensibleHeatFromLakeSubarea      | Sensible heat flux from lake subarea [W m-2]                                                                                                      |
| QSENLROT  | SensibleHeatFromLakeSubarea_In   | Sensible heat flux from lake subarea [W m-2] (ROT)                                                                                                |
| RADJLGAT  | LatitudeInRad                    | Latitude of grid cell (positive north of equator) [rad]                                                                                           |
| RADJROW   | LatitudeInRad_In                 | Latitude of grid cell (positive north of equator) [rad]                                                                                           |
| RGAS      | GasConstant                      | Gas constant [J kg-1 K-1]                                                                                                                         |
| RGASV     | GasConstantOfH2OVapour           | Gas constant for water vapour [J kg-1 K-1]                                                                                                        |
| RHOAGAT   | DensityOfAir                     | Density of air [kg m-3]                                                                                                                           |
| RHOAROW   | DensityOfAir_In                  | Density of air [kg m-3]                                                                                                                           |
| RHOICE    | DensityOfIce                     | Density of ice [kg m-3], defined as 0.917 x 10 <sup>3</sup>                                                                                       |
| RHOIW     | DensityRatioOfIceToWater         | Ratio of density of ice to water                                                                                                                  |
| RHOMIX    | MixLyrDensity                    | Density of the mixing layer                                                                                                                       |
| RHOSLGAT  | SnowPackDensity                  | Density of snow [kg m-3] (ps)                                                                                                                     |
| RHOSLRROT | SnowPackDensity_In               | Density of snow [kg m-3] (ps) (ROT)                                                                                                               |
| RHOW      | DensityOfH2O                     | Density of water [kg m-3], defined as 1 x 10 <sup>3</sup>                                                                                         |
| RHSILGAT  | DensityOfFreshSnow               | Density of fresh snow [kg m-3]                                                                                                                    |

|          |                                           |                                                                                                                    |
|----------|-------------------------------------------|--------------------------------------------------------------------------------------------------------------------|
| RHSIROW  | DensityOfFreshSnow_In                     | Density of fresh snow [kg m <sup>-3</sup> ]                                                                        |
| ROFICEH  | RunoffFromIce                             | Runoffice                                                                                                          |
| ROFNLGAT | SnowRunoff                                | Liquid water runoff from snow pack [kg m <sup>-2</sup> s <sup>-1</sup> ]                                           |
| ROFNLROT | SnowRunoff_In                             | Liquid water runoff from snow pack [kg m <sup>-2</sup> s <sup>-1</sup> ] (ROT)                                     |
| RPCPLGAT | WetPrecip                                 | Rainfall rate over modelled area [m s <sup>-1</sup> ]                                                              |
| RPCPROW  | WetPrecip_In                              | Rainfall rate over modelled area [m s <sup>-1</sup> ]                                                              |
| SBC      | StefanBoltzmannConst                      | Stefan-Boltzmann constant [W m <sup>-2</sup> K <sup>-4</sup> ]                                                     |
| SFHLGAT  | DiagRelavtiveHumidAtScreenLevel           | Diagnosed screen-level relative humidity [%]                                                                       |
| SFHLROT  | DiagRelavtiveHumidAtScreenLevel_In        | Diagnosed screen-level relative humidity [%] (ROT)                                                                 |
| SFQLGAT  | DiagSpecificHumidAtScreenLevel            | Diagnosed screen-level specific humidity [kg kg <sup>-1</sup> ]                                                    |
| SFQLROT  | DiagSpecificHumidAtScreenLevel_In         | Diagnosed screen-level specific humidity [kg kg <sup>-1</sup> ] (ROT)                                              |
| SFTLGAT  | DiagAirTempAtScreenLevel                  | Diagnosed screen-level air temperature [K]                                                                         |
| SFTLROT  | DiagAirTempAtScreenLevel_In               | Diagnosed screen-level air temperature [K] (ROT)                                                                   |
| SFULGAT  | DiagZonalWindSpdAtAnemometerLevel         | Diagnosed anemometer-level zonal wind [m s <sup>-1</sup> ]                                                         |
| SFULROT  | DiagZonalWindSpdAtAnemometerLevel_In      | Diagnosed anemometer-level zonal wind [m s <sup>-1</sup> ] (ROT)                                                   |
| SFVLGAT  | DiagMeridionalWindSpdAtAnemometerLevel    | Diagnosed anemometer-level meridional wind [m s <sup>-1</sup> ]                                                    |
| SFVLROT  | DiagMeridionalWindSpdAtAnemometerLevel_In | Diagnosed anemometer-level meridional wind [m s <sup>-1</sup> ] (ROT)                                              |
| SNICEH   | SnowIceHeight                             | Snow Ice Height                                                                                                    |
| SNOLGAT  | SnowPackMass                              | Mass of snow pack [kg m <sup>-2</sup> ] (Ws)                                                                       |
| SNOLROT  | SnowPackMass_In                           | Mass of snow pack [kg m <sup>-2</sup> ] (Ws) (ROT)                                                                 |
| SPCPLGAT | FrozenPrecip                              | Snowfall rate over modelled area [m s <sup>-1</sup> ]                                                              |
| SPCPROW  | FrozenPrecip_In                           | Snowfall rate over modelled area [m s <sup>-1</sup> ]                                                              |
| SPHAIR   | SpecificHeatOfAir                         | Specific heat of air [J kg <sup>-1</sup> K <sup>-1</sup> ]                                                         |
| SPHICE   | SpecificHeatOfIce                         | Specific heat of ice [J m <sup>-3</sup> K <sup>-1</sup> ], defined as 2.10 x 10 <sup>3</sup>                       |
| SPHW     | SpecificHeatOfH2O                         | Specific heat of water [J m <sup>-3</sup> K <sup>-1</sup> ], defined as 4.186 x 10 <sup>3</sup>                    |
| TOLAK    | LakeSkinTemp                              | Skin temperature of the lake                                                                                       |
| TADPROW  | DewPointTemp_In                           | Dew point temperature of air [K]                                                                                   |
| TAGAT    | AirTempAtRef                              | Air temperature at reference height [K]                                                                            |
| TAROW    | AirTempAtRef_In                           | Air temperature at reference height [K]                                                                            |
| TCICE    | ThermalConductOfIce                       | Thermal conductivity of ice [W m <sup>-1</sup> K <sup>-1</sup> ], defined as 2.24                                  |
| TCW      | ThermalConductOfH2O                       | Thermal conductivity of water [W m <sup>-1</sup> K <sup>-1</sup> ], defined as 0.57                                |
| TFREZ    | FreezingPointOfH2O                        | Freezing point of water [K]                                                                                        |
| TFXLGAT  | ProdLakeDragWindSpdDelT                   | Product of lake surface drag coefficient, wind speed and surface-air temperature difference [K m s <sup>-1</sup> ] |

|          |                               |                                                                                                                          |
|----------|-------------------------------|--------------------------------------------------------------------------------------------------------------------------|
| TFXLROT  | ProdLakeDragWindSpdDeIT_In    | Product of lake surface drag coefficient, wind speed and surface-air temperature difference [K m s-1] (ROT)              |
| TKECE    | TotalKineticEnergyEff_CE      | Total Kinetic Energy process efficiency 'CE', defined in MacKay 2012 as 1.15                                             |
| TKECF    | TotalKineticEnergyEff_CF      | Total Kinetic Energy process efficiency 'CF', defined in MacKay 2012 as 0.25                                             |
| TKECL    | TotalKineticEnergyEff_CL      | Total Kinetic Energy process efficiency 'CL', defined in MacKay 2012 as 0.235 but large uncertainty exists in this value |
| TKECN    | TotalKineticEnergyEff_CN      | Total Kinetic Energy process efficiency 'CN', defined in MacKay 2012 as 1.33                                             |
| TKECS    | TotalKineticEnergyEff_CS      | Total Kinetic Energy process efficiency 'CS', defined in MacKay 2012 as 0.2                                              |
| TKELAK   | TotalKineticEnergy            | Total Kinetic Energy in mixing layer, used in MixLayer()                                                                 |
| TKEMIN   | MinimumKineticEnergy          | Minimum Kinetic Energy, set at $1 \times 10^{-12}$                                                                       |
| TLAKGAT  | LakeTempProfile               |                                                                                                                          |
| TLAKROT  | LakeTempProfile_In            |                                                                                                                          |
| TRPCLGAT | WetPrecipTemp                 | Rainfall temperature [K]                                                                                                 |
| TRPCROW  | WetPrecipTemp_In              | Rainfall temperature [K]                                                                                                 |
| TSED     | SedimentTemp                  | Sediment Temperature                                                                                                     |
| TSNOLGAT | SnowPackTemp                  | Snowpack temperature [K] (Ts)                                                                                            |
| TSNOLROT | SnowPackTemp_In               | Snowpack temperature [K] (Ts) (ROT)                                                                                      |
| TSPCLGAT | FrozenPrecipTemp              | Snowfall temperature [K]                                                                                                 |
| TSPCROW  | FrozenPrecipTemp_In           | Snowfall temperature [K]                                                                                                 |
| ULGAT    | ZonalWindSpeed                | Zonal component of wind speed [m s-1]                                                                                    |
| ULROW    | ZonalWindSpeed_In             | Zonal component of wind speed [m s-1]                                                                                    |
| UVROW    | WindSpeed                     | Wind speed [m s-1]                                                                                                       |
| VKC      | VonKarmanConst                | Von Karman constant, defined as 0.4                                                                                      |
| VLGAT    | MeridionalWindSpeed           | Meridional component of wind speed [m s-1]                                                                               |
| VLROW    | MeridionalWindSpeed_In        | Meridional component of wind speed [m s-1]                                                                               |
| VMIN     | MinWindSpd                    | Minimum wind speed [m s-1], defined as 0.1                                                                               |
| VPDROW   | VapourPressureDeficit_In      | Vapour pressure deficit [mb]                                                                                             |
| WSNOLGAT | SnowPackLiquidWaterContent    | Liquid water content of snow pack [kg m-2]                                                                               |
| WSNOLROT | SnowPackLiquidWaterContent_In | Liquid water content of snow pack [kg m-2] (ROT)                                                                         |

|         |                                          |                                                                                                                               |
|---------|------------------------------------------|-------------------------------------------------------------------------------------------------------------------------------|
| ZBLDROW | AtmoBlendingHeightForSurfaceRoughness_In | Atmospheric blending height for surface roughness length averaging [m],<br>Geophysical data, 5th number on 4th line of ini    |
| ZBOT    | CurrentLayerBottom                       | Bottom of the current layer for local calculations                                                                            |
| ZDHLGAT | VarHeight                                | User-specified height associated with diagnosed screen-level variables<br>[m]                                                 |
| ZDHRW   | VarHeight_In                             | User-specified height associated with diagnosed screen-level variables<br>[m]                                                 |
| ZDMLGAT | AnemometerHeight                         | User-specified height associated with diagnosed anemometer-level wind<br>speed [m]                                            |
| ZDMROW  | AnemometerHeight_In                      | User-specified height associated with diagnosed anemometer-level wind<br>speed [m]                                            |
| ZRFHGAT | RefHeightAirTempAndHumidForcing          | Reference height associated with forcing air temperature and humidity<br>[m], Geophysical data, 4rd number on 4th line of ini |
| ZRFHROW | RefHeightAirTempAndHumidForcing_In       | Reference height associated with forcing air temperature and humidity<br>[m], Geophysical data, 4rd number on 4th line of ini |
| ZRFMGAT | RefHeightWindSpeedForcing                | Reference height associated with forcing wind speed [m], "Geophysical<br>data", 3rd number on 4th line of ini                 |
| ZRFMROW | RefHeightWindSpeedForcing_In             | Reference height associated with forcing wind speed [m], "Geophysical<br>data", 3rd number on 4th line of ini                 |
| ZTOP    | CurrentLayerTop                          | Top of current layer for calculations                                                                                         |
